# Supplementary material for: Rare germline variants in the E-cadherin gene CDH1 are associated with the risk of brain tumors of neuroepithelial and epithelial origin
Source: PubMed Central journal article supplement (PMC8217027; doi:10.1007/s00401-021-02307-1), 2021-04-30
Supplement: 401_2021_2307_MOESM1_ESM.pdf [file 401_2021_2307_MOESM1_ESM.pdf]

**Rare germline variants in the E-cadherin gene *CDH1* are associated with the risk of brain tumors of neuroepithelial and epithelial origin**

Alisa Förster<sup>1\*</sup>, Frank Brand<sup>1\*</sup>, Rouzbeh Banan<sup>2,3</sup>, Robert Hüneburg<sup>4,5</sup>, Christine A. M. Weber<sup>1</sup>, Wiebke Ewert<sup>6</sup>, Jessica Kronenberg<sup>7,8,9</sup>, Christopher Previti<sup>10,11</sup>, Natalie Elyan<sup>1</sup>, Ulrike Beyer<sup>1</sup>, Helge Martens<sup>1</sup>, Bujung Hong<sup>12</sup>, Jan H. Bräsen<sup>13</sup>, Andreas Erbersdobler<sup>14</sup>, Joachim K. Krauss<sup>12</sup>, Martin Stangel<sup>7,8</sup>, Amir Samii<sup>15</sup>, Stephan Wolf<sup>10</sup>, Matthias Preller<sup>6,16</sup>, Stefan Aretz<sup>4,17</sup>, Bettina Wiese<sup>12,18</sup>, Christian Hartmann<sup>2</sup>, Ruthild G. Weber<sup>1</sup>

<sup>1</sup>Department of Human Genetics, Hannover Medical School, Hannover, Germany

<sup>2</sup>Department of Neuropathology, Institute of Pathology, Hannover Medical School, Hannover, Germany

<sup>3</sup>Department of Neuropathology, Institute of Pathology, University Hospital Heidelberg, Heidelberg, Germany

<sup>4</sup>National Center for Hereditary Tumor Syndromes, University Hospital Bonn, Bonn, Germany

<sup>5</sup>Department of Internal Medicine I, University Hospital Bonn, Bonn, Germany

<sup>6</sup>Institute for Biophysical Chemistry, Hannover Medical School, Hannover, Germany

<sup>7</sup>Clinical Neuroimmunology and Neurochemistry, Department of Neurology, Hannover Medical School, Hannover, Germany

<sup>8</sup>Center for Systems Neuroscience, University of Veterinary Medicine Hannover, Hannover, Germany

<sup>9</sup>German Aerospace Centre (DLR), Institute of Aerospace Medicine, Radiation Biology Department, Köln, Germany

<sup>10</sup>Genomics and Proteomics Core Facility, High Throughput Sequencing Unit W190; German Cancer Research Center (DKFZ), Heidelberg, Germany

<sup>11</sup>Omics IT and Data Management Core Facility W610, German Cancer Research Center (DKFZ), Heidelberg, Germany

<sup>12</sup>Department of Neurosurgery, Hannover Medical School, Hannover, Germany

<sup>13</sup>Nephropathology, Institute of Pathology, Hannover Medical School, Hannover, Germany

<sup>14</sup>Institute of Pathology, University of Rostock, Rostock, Germany

<sup>15</sup>Department of Neurosurgery, International Neuroscience Institute, Hannover, Germany

<sup>16</sup>Department of Natural Sciences, University of Applied Sciences Bonn-Rhein-Sieg, Germany

<sup>17</sup>Institute of Human Genetics, Medical Faculty, University of Bonn, Bonn, Germany

<sup>18</sup>Department of Neurology, Henriettenstift, Diakovere Krankenhaus gGmbH, Hannover, Germany

\*Alisa Förster and Frank Brand contributed equally as first authors to this work.

Correspondence to: Ruthild G. Weber, M.D., Department of Human Genetics OE 6300, Hannover Medical School, Carl-Neuberg-Str. 1, 30625 Hannover, Germany, Phone +49 511 532 7751, Fax +49 511 532 18520, Email: Weber.Ruthild@mh-hannover.de

Short running title: *CDH1* germline variants in brain tumor risk

## SUPPLEMENTARY MATERIALS AND METHODS

### **Isolation of rat oligodendroglial cells**

To prepare primary oligodendroglial cultures from neonatal Sprague-Dawley rats (P0-P3), meninges, choroid plexus, cerebellum and brain stem were removed, and brains were dissociated mechanically and digested enzymatically with 0.1% trypsin (Biochrom, Berlin, Germany) and 0.25% DNase (Roche, Basel, Switzerland). The obtained single cell suspensions were seeded into culture flasks pre-coated with poly-L-lysine (Sigma-Aldrich, St. Louis, MO, USA). Cultures were kept in Dulbecco's Modified Eagle Medium (DMEM; Thermo Fisher Scientific, Waltham, MA, USA) supplemented with 1% penicillin/streptomycin (Sigma-Aldrich) at 37°C and 5% CO<sub>2</sub> until use. On day 7, microglial cells were harvested after shaking the culture flasks at 180 rpm and 37°C for 40 min on an orbital shaker. After allowing the remaining cells in the culture flasks to rest for at least 2 h, oligodendroglial cells were isolated by orbitally shaking the culture flasks at 160 rpm and 37°C for 16-20 h. Supernatants were collected, centrifuged and, to reduce contamination with astrocytes and microglia, cells were kept in uncoated culture flasks for 20-30 min at 37°C. Medium containing free-floating oligodendroglial cells was collected, centrifuged, and cells were seeded on glass coverslips coated with poly-L-lysine and kept in medium until day 4 and 6, whereby 80,000 cells were plated in proliferation medium: KnockOut™ DMEM/F-12 supplemented with GlutaMAX™, StemPro supplement, EGF, human FGF, PDGF-AA (all from Thermo Fisher Scientific), and 100,000 cells were plated in differentiation medium: Neurobasal® medium supplemented with GlutaMAX™, B-27 supplement (all from Thermo Fisher Scientific), and 30 ng/ml T3 (Sigma-Aldrich).

### **Antibodies used for immunofluorescence microscopy**

The following primary antibodies were used for immunostaining of oligodendroglial (precursor) cells: mouse anti-E-cadherin (#610181, Becton, Dickinson and Company, Franklin Lakes, NJ, USA; dilution 1:50), rabbit anti-Olig2 (#AB9610, Sigma-Aldrich; dilution 1:500), and mouse anti-MBP (#SMI99, BioLegend, San Diego, CA, USA; dilution 1:500).

### **CRISPR/Cas9-mediated knock-in of *CDH1*:c.2450C>T p.(A817V)**

To generate a knock-in of *CDH1*:c.2450C>T p.(A817V) in HEK293T cells, the synthesized guide RNA (gRNA) was inserted by T4 DNA ligase into a *Bpil*-digested pSpCas9(BB)-2A-GFP plasmid (#48138, Addgene, Watertown, MA, USA) containing a gRNA scaffold and expression cassettes for Cas9 and GFP. By transient transfection, the Cas9/gRNA construct and the homology-directed repair template were introduced into HEK293T cells. After 24 hours, GFP-positive cells were isolated using a MoFlo XDP cell sorter (Beckman-Coulter, Brea, MA, USA), and their genomic DNA was extracted using the innuPREP DNA Mini Kit (Analytik Jena, Jena, Germany). To identify the knock-in genotype of selected cell clones, PCR products of *CDH1* exon 16 were analyzed by (i) direct sequencing and (ii) agarose gel electrophoresis after 16 h treatment with *TauI* restriction enzyme to verify the loss of one of two *TauI* restriction sites due to the introduced *CDH1*:c.2450C>T variant.

### **Primary antibodies used for Western blot analysis**

The following primary antibodies were used for immunodetection: anti-AKT (pan) (#4691, C67E7, Cell Signaling Technology (CST), Danvers, MA, USA; dilution 1:1,000), anti-phospho-AKT (Ser473) (#4060, D9E, CST; dilution 1:1,000), anti-E-cadherin (#3195, 24E10, CST; dilution 1:1,000), anti- $\beta$ -catenin (#2698, L87A12, CST; dilution 1:1,000), anti-non-phospho-Ser45-(active)- $\beta$ -catenin (#19807, D2U8Y, CST; dilution 1:1,000), anti-GAPDH (MAB374, 6C5, Merck; dilution 1:3,000), anti-GFP (sc-9996, Santa Cruz Biotechnology, Dallas, TX, USA; dilution 1:1,000), anti-lamin A/C (#4777, 4C11, CST; dilution 1:1,000) or anti- $\alpha$ -tubulin (#2125, 11H10, CST; dilution 1:1,000).

### **Molecular dynamics simulations**

For molecular dynamics simulations, the crystallized sequence of the ectodomain of wildtype and mutant E-cadherin were fully solvated with the TIP3P explicit water model (Jorgensen et al. 1983), and the systems were neutralized by adding Na<sup>+</sup> counter ions. A minimum distance of 9 Å between the protein and water box edges was used with periodic boundary conditions.

Langevin dynamics and the Langevin piston method maintained a constant temperature of 310 K and a constant pressure of 1 atm. A cutoff of 12 Å was used for van-der-Waals and short-range electrostatics, and the particle-mesh Ewald method (Darden et al. 1993) was used for long-range electrostatic interactions. The solvated systems were initially energy-minimized and equilibrated for at least 5 ns, prior to 100 ns production runs with an integration time step of 2 fs. All MD simulations were carried out on the supercomputer of the North-German Supercomputing Alliance (HLRN). Dynamical network analysis was carried out according to Sethi et al. (2009). Simulation trajectory analysis was performed using VMD 1.9 (Humphrey et al. 1996).

## SUPPLEMENTARY FIGURES

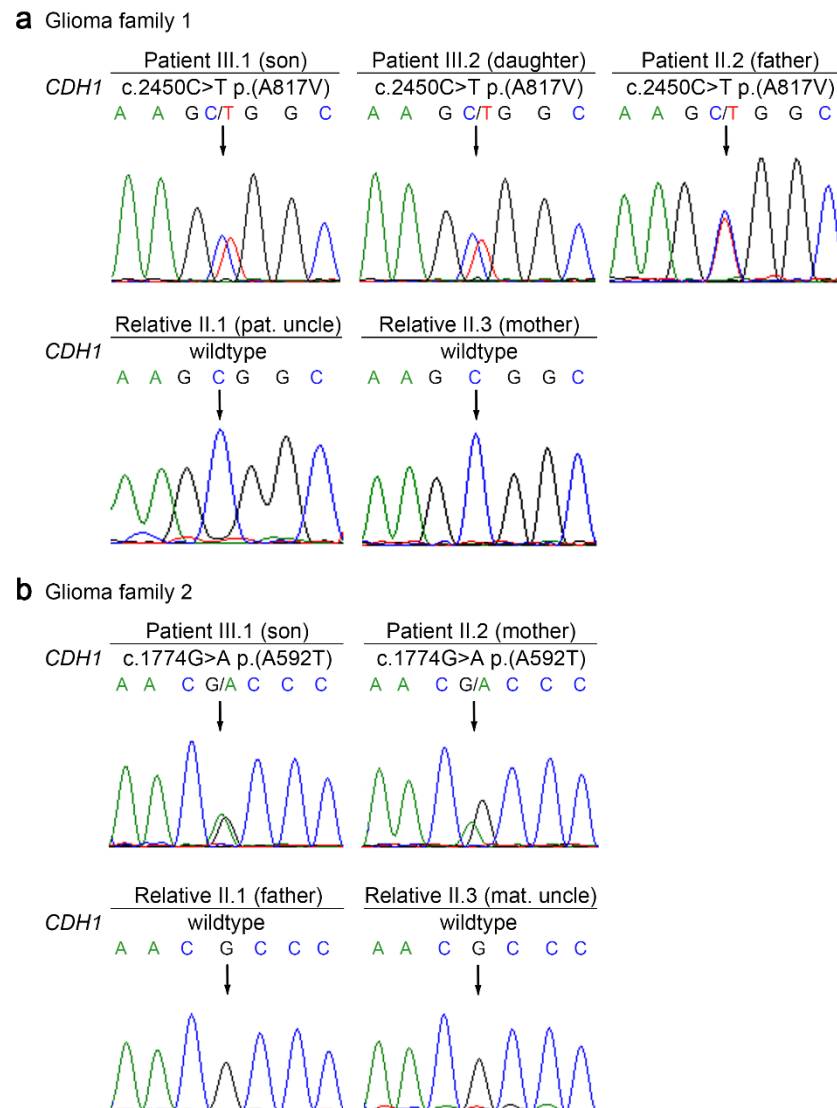

**Suppl. Fig. 1** The identified rare heterozygous *CDH1* variants co-segregate with the tumor phenotype in glioma families 1 and 2 as determined by direct sequencing. **a** Electropherograms of glioma family 1 confirming the presence of the heterozygous *CDH1*:c.2450C>T p.(A817V) variant, which was initially identified by whole-genome sequencing, in the germline of patients III.1 (son), III.2 (daughter), and II.2 (father) with oligodendroglioma, WHO grade II/III, IDH-mutant and 1p/19q-codeleted, but not in their tumor-unaffected relatives II.1 (paternal uncle) and II.3 (mother). **b** Electropherograms of glioma family 2 demonstrating the heterozygous *CDH1*:c.1774G>A p.(A592T) variant in the germline of patient III.1 (son) with oligodendroglioma, WHO grade II, IDH-mutant and 1p/19q-codeleted and patient II.2 (mother) with a serous ovarian carcinoma, but not in their tumor-unaffected relatives II.1 (father) and II.3 (maternal uncle). Nucleotide numbering according to nucleotide position in the coding sequence of NCBI Reference Sequence: NM\_004360.

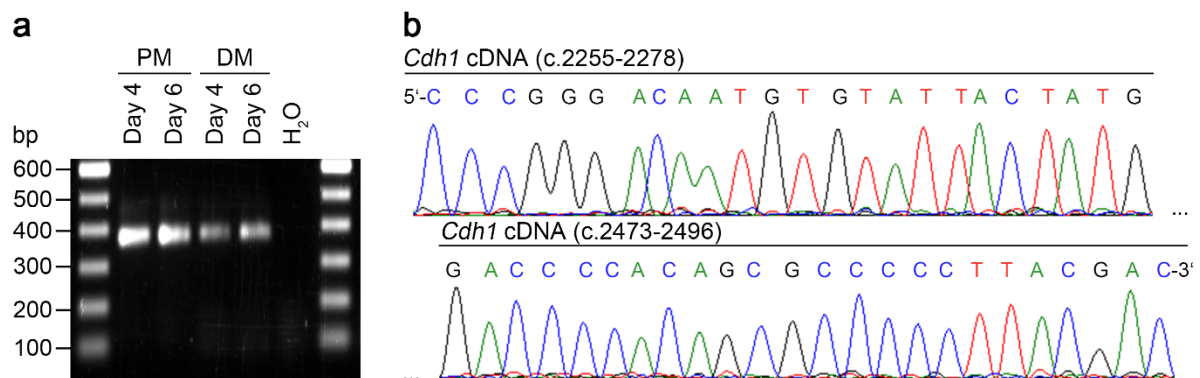

**Suppl. Fig. 2** Qualitative *Cdh1* mRNA analysis confirming the presence of *Cdh1*-specific sequences in RNA samples from rat oligodendroglial cultures. Oligodendroglial cells were isolated from neonatal Sprague-Dawley rats (P0-P3) and cultured in either proliferation medium (PM) or differentiation medium (DM) for four or six days. After first-strand cDNA synthesis from total RNA extracted from oligodendroglial cultures at day 4 or day 6, specific oligonucleotides (Suppl. Table 9) were used to amplify a part of the rat *Cdh1* cDNA sequence (NM\_031334, c.2165-2536). **a** By gel electrophoresis, a PCR product consistent with the expected rat *Cdh1* cDNA band of 372 bp was detected irrespective of medium used on oligodendroglial cultures or culture duration. **b** Each PCR product shown in (a) was subjected to direct sequencing. All obtained electropherograms confirmed the presence of sequences specific for rat *Cdh1* cDNA that are not conserved in other cadherin family members. One of the electropherograms is partly shown.

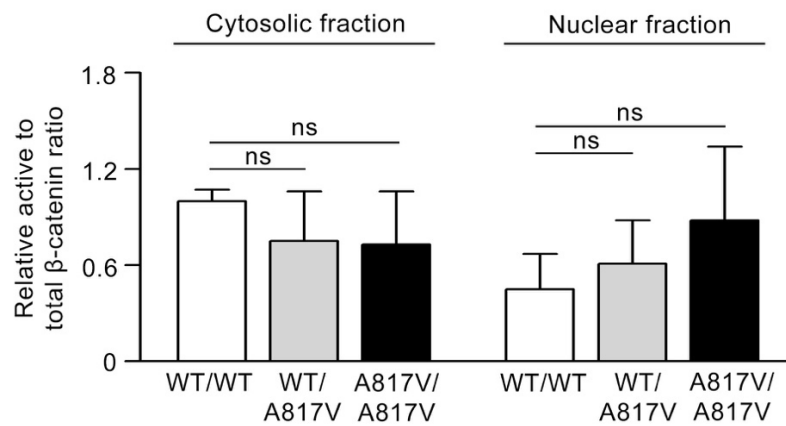

**Suppl. Fig. 3** The ratios of active and total  $\beta$ -catenin levels were not significantly different in the cytosolic or nuclear fraction of WT/A817V and A817V/A817V compared to WT/WT cells. Protein bands of active  $\beta$ -catenin (detected using a non-phospho-Ser45-specific antibody) and total  $\beta$ -catenin detected by Western blot analysis after subcellular fractionation (as shown in Fig. 3I) were quantified by densitometry (mean $\pm$ SD of two independent experiments); ns, not significant (Student's *t* test).

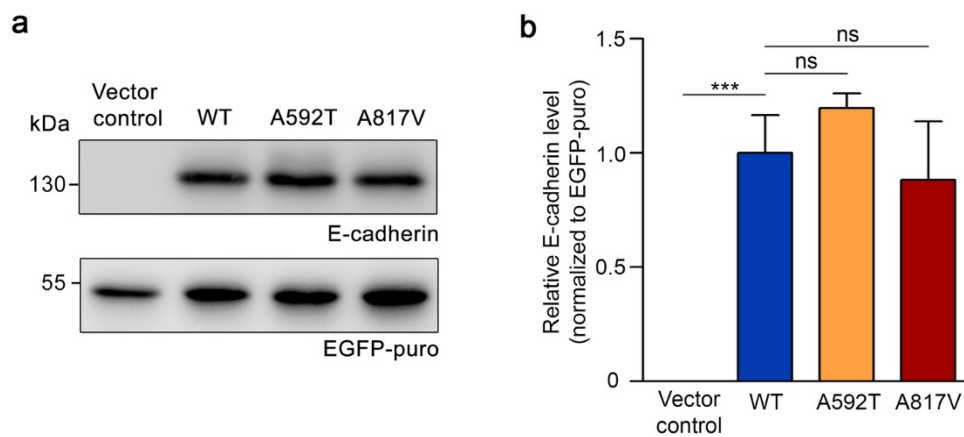

**Suppl. Fig. 4** E-cadherin expression in CHO cells transfected with pIRES-EGFP-puro (vector control), pIRES-CDH1 wildtype-EGFP-puro (WT), pIRES-CDH1 A592T-EGFP-puro (A592T), or pIRES-CDH1 A817V-EGFP-puro (A817V), selected by puromycin treatment followed by cell sorting. **a** Cell lysates were examined by Western blot analysis using anti-E-cadherin and anti-GFP antibodies. **b** By densitometric quantification of Western blot analyses (**a**), E-cadherin levels normalized to the co-expressed EGFP-puro were comparable in stably WT and mutant (A592T and A817V) E-cadherin expressing CHO cells (mean±SD of four independent experiments). \*\*\* $p \leq 0.001$ ; ns, not significant (Student's *t* test).



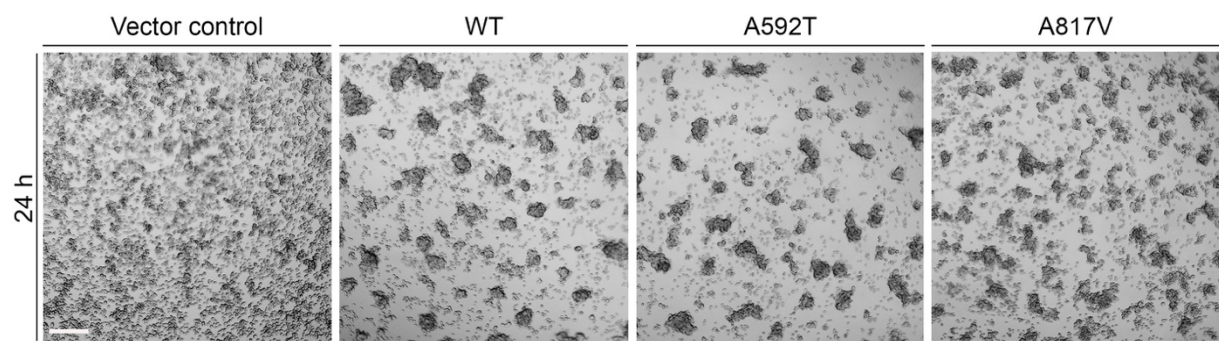

**Suppl. Fig. 5** Reduced cell aggregation was observed in CHO cells expressing E-cadherin A817V compared to wildtype E-cadherin expressing cells. Representative images of one of three independent experiments performed in triplicate are shown. Scale bar 200  $\mu$ m.

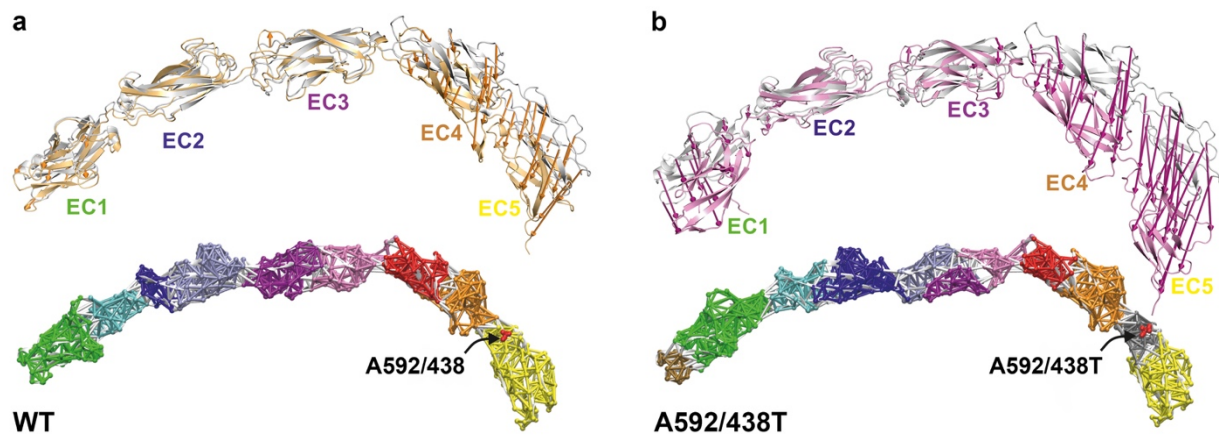

**Suppl. Fig. 6** Molecular dynamics (MD) simulations of the mature ectodomain, comprising extracellular cadherin (EC) domains EC1 to EC5, of murine E-cadherin WT (82% sequence identity to the human E-cadherin ectodomain, a crystal structure of the human ectodomain is only available of EC1 and EC2) and E-cadherin A592/438T (the human residue A592 in the pre-protein corresponds to A438 in the mature protein, which is conserved in mouse). **a**, **b** Upper panel: conformational changes of the E-cadherin WT (**a**) and E-cadherin A592/438T (**b**) ectodomain along the 100 ns MD simulations. Structural changes from the starting structure (grey) are indicated by vectors (**a**, orange; **b**, pink). E-cadherin A592/438T showed increased flexibility particularly of EC1, EC4, and EC5 as illustrated by the larger vector arrows (**b**). Lower panel: dynamical network analysis shows network communities that correlate with the domain architecture of the ectodomain. Network communities of correlated motions are colored individually. Red spheres are used to highlight residue A592/438. The A592/438T variant led to a new network community (grey) around the site of the variant (shown as red spheres) that is uncoupled from the network community (yellow) of the remaining EC5 domain, and also altered the network communities of the EC1 domain (**b**).

## SUPPLEMENTARY TABLES

**Suppl. Table 1** Analysis of WGS germline data from two siblings (III.1, III.2) and their father (II.2) with oligodendroglioma, WHO grade II/III, IDH-mutant and 1p/19q-codeleted, and their unaffected relatives (II.1, II.3) of glioma family 1 using a linkage-based strategy to identify glioma-predisposing genes

| Filtering steps                                                                                                                                                                                                                                                                                                                         | Number of variants                                                                                                                      |
|-----------------------------------------------------------------------------------------------------------------------------------------------------------------------------------------------------------------------------------------------------------------------------------------------------------------------------------------|-----------------------------------------------------------------------------------------------------------------------------------------|
| Total variants in genomes obtained from whole blood                                                                                                                                                                                                                                                                                     | Patient III.1: 4,589,862<br>Patient III.2: 4,704,752<br>Patient II.2: 4,534,339<br>Relative II.1: 4,577,452<br>Relative II.3: 4,672,720 |
| Linkage-based strategy: high quality variants (read depth $\geq 10$ , call quality $\geq 50$ , allele fraction $\geq 20\%$ in all samples) shared by patients III.1, III.2 and II.2 affected by oligodendroglioma, WHO grade II/III, IDH-mutant and 1p/19q-codeleted but not found in unaffected relatives (II.1 and II.3) are retained | 111,708                                                                                                                                 |
| Rare variants ( $\leq 0.5\%$ in the 1000 Genomes Project, ExAC and gnomAD datasets, and the NHLBI ESP exomes) <sup>a</sup> are retained                                                                                                                                                                                                 | 9,309                                                                                                                                   |
| Non-silent (i.e. splice site: up to 2 bases into intron, frameshift, in-frame indels, stop gained/lost and non-synonymous missense) variants and promoter region variants are retained                                                                                                                                                  | 290                                                                                                                                     |
| Variants predicted to be deleterious by at least one prediction tool (i.e. SIFT, PolyPhen-2 or RegulationSpotter) <sup>b</sup> , and, in the case of non-silent variants, verified by Sanger sequencing to co-segregate with the oligodendroglioma phenotype are retained                                                               | 30 <sup>c</sup>                                                                                                                         |
| Variant in cancer predisposing gene (Rahman 2014) is retained                                                                                                                                                                                                                                                                           | 1 ( <i>CDH1</i> )                                                                                                                       |

<sup>a</sup>1000 Genomes Project data (<http://www.internationalgenome.org/>), Exome Aggregation Consortium (ExAC) and Genome Aggregation Database (gnomAD) (<http://gnomad.broadinstitute.org/>), NHLBI Exome Sequencing Project (<http://evs.gs.washington.edu/EVS/>)

<sup>b</sup>SIFT (<http://sift.jcvi.org/>), PolyPhen-2 (<http://genetics.bwh.harvard.edu/pph2/>), RegulationSpotter (<http://www.regulationspotter.org/>)

<sup>c</sup>Variants are summarized in Suppl. Table 2

**Suppl. Table 2** Rare non-silent or promoter region variants predicted to be deleterious that are shared by patients III.1, III.2, and II.2 with oligodendroglioma, WHO grade II/III, IDH-mutant and 1p/19q-codeleted, but not found in tumor-unaffected family members II.1 and II.3, and, thus, co-segregate with the oligodendroglioma phenotype in glioma family 1 (n=30)

| Genomic position (GRCh37/hg19) | Variation type       | Gene symbol | Transcript ID  | Nucleotide alteration | Deduced protein change | dbSNP <sup>a</sup> | MAF (%) <sup>b</sup> | Prediction according to |                         |                                 | Cancer predisposing gene <sup>f</sup> |
|--------------------------------|----------------------|-------------|----------------|-----------------------|------------------------|--------------------|----------------------|-------------------------|-------------------------|---------------------------------|---------------------------------------|
|                                |                      |             |                |                       |                        |                    |                      | SIFT <sup>c</sup>       | PolyPhen-2 <sup>d</sup> | Regulation Spotter <sup>e</sup> |                                       |
| 2:109087055-109087056          | Deletion             | GCC2        | NM_181453.4    | c.1273_1274 delAG     | p.E425Sfs*5            | rs1477651601       | 0.001                | NA                      | NA                      | NA                              | No                                    |
| 2:183387027                    | SNV                  | PDE1A       | NM_005019.5    | c.77A>G               | p.K26R                 | rs144085392        | 0.124                | Damaging                | Benign                  | NA                              | No                                    |
| 2:186604144                    | SNV in promoter      | FSIP2-AS2   | NR_110214.1    | n.-324C>A             | -                      | rs768058514        | 0.026                | NA                      | NA                      | Disease causing                 | No                                    |
| 2:33701653                     | SNV in promoter      | RASGRP3     | NM_001139488.2 | c.-382T>A             | -                      | -                  | -                    | NA                      | NA                      | Disease causing                 | No                                    |
| 2:88383996                     | SNV                  | SMYD1       | NM_198274.4    | c.299C>A              | p.P100H                | rs145518325        | 0.101                | Damaging                | Probably damaging       | NA                              | No                                    |
| 2:88383996                     | SNV in promoter      | MIR4780     | NR_039940.1    | n.-1878G>T            | -                      | rs145518325        | 0.101                | NA                      | NA                      | Disease causing                 | No                                    |
| 3:11685869                     | SNV in promoter      | VGLL4       | NM_001128219.3 | c.-877A>G             | -                      | rs182748059        | 0.013                | NA                      | NA                      | Disease causing                 | No                                    |
| 4:177605121                    | SNV                  | VEGFC       | NM_005429.5    | c.1219C>T             | p.R407C                | rs373412644        | 0.003                | Damaging                | Probably damaging       | NA                              | No                                    |
| 4:36307915-36307917            | Deletion             | DTHD1       | NM_001170700.3 | c.1374_1376 delTGT    | p.V459del              | rs747697241        | 0.029                | NA                      | NA                      | NA                              | No                                    |
| 4:87662802                     | SNV                  | PTPN13      | NM_080685.2    | c.2320A>G             | p.T774A                | rs776072423        | 0.003                | Tolerated               | Possibly damaging       | NA                              | No                                    |
| 4:87855771                     | SNV in promoter      | AFF1        | NM_001166693.2 | c.-658T>A             | -                      | rs542606613        | 0.233                | NA                      | NA                      | Disease causing                 | No                                    |
| 6:97677161-97677163            | Deletion             | MMS22L      | NM_198468.4    | c.1646_1648 delGTC    | p.S549_H550 delinsN    | rs1165215914       | 0.001                | NA                      | NA                      | NA                              | No                                    |
| 6:99887715                     | SNV                  | USP45       | NM_001080481.2 | c.2090G>A             | p.R697H                | rs139278154        | 0.002                | Damaging                | Probably damaging       | NA                              | No                                    |
| 8:70405036                     | SNV in promoter      | SULF1       | NM_001128206.2 | c.-553A>G             | -                      | rs867273836        | 0.013                | NA                      | NA                      | Disease causing                 | No                                    |
| 9:32552878                     | SNV                  | SMIM27      | NM_001349118.1 | c.125A>G              | p.K42R                 | rs554234544        | 0.081                | NA                      | Possibly damaging       | NA                              | No                                    |
| 9:5968303                      | SNV                  | KIAA2026    | NM_001017969.3 | c.1928A>G             | p.H643R                | rs201096994        | 0.108                | Damaging                | Possibly damaging       | NA                              | No                                    |
| 9:90535756                     | SNV                  | SPATA31C1   | NM_001145124.1 | c.934G>C              | p.D312H                | rs201907359        | 0.262                | NA                      | Possibly damaging       | NA                              | No                                    |
| 11:114577269                   | SNV                  | NXPE2       | NM_182495.6    | c.1297C>T             | p.R433W                | rs763575029        | 0.005                | Damaging                | Probably damaging       | NA                              | No                                    |
| 11:34643113                    | Deletion in promoter | EHF         | NM_001378053.1 | c.-845delA            | -                      | -                  | -                    | NA                      | NA                      | Disease causing                 | No                                    |

|                      |                       |               |                   |                     |          |             |       |           |                   |                 |     |
|----------------------|-----------------------|---------------|-------------------|---------------------|----------|-------------|-------|-----------|-------------------|-----------------|-----|
| 11:59211102          | SNV                   | <i>OR5A1</i>  | NM_001004728.1    | c.461G>T            | p.G154V  | rs765560979 | 0.001 | Tolerated | Probably damaging | NA              | No  |
| 11:94760049          | SNV                   | <i>KDM4E</i>  | NM_0011161630.1   | c.1328G>A           | p.R443H  | rs374081859 | 0.031 | Tolerated | Possibly damaging | NA              | No  |
| 15:78556472          | SNV in promoter       | <i>DNAJA4</i> | NM_0011130182.1   | c.-634G>C           | -        | rs939059379 | 0.006 | NA        | NA                | Disease causing | No  |
| 16:23569332          | SNV in promoter       | <i>EARS2</i>  | NR_003501.1       | n.-636C>A           | -        | rs375139253 | 0.170 | NA        | NA                | Disease causing | No  |
| 16:31092320          | SNV                   | <i>ZNF646</i> | NM_014699.4       | c.4675T>C           | p.C1559R | -           | -     | Damaging  | Probably damaging | NA              | No  |
| 16:68867203          | SNV                   | <i>CDH1</i>   | NM_004360.5       | c.2450C>T           | p.A817V  | rs587782024 | 0.003 | Damaging  | Probably damaging | NA              | Yes |
| 16:69184603          | SNV                   | <i>UTP4</i>   | NM_032830.3       | c.902T>C            | p.I301T  | -           | -     | Damaging  | Possibly damaging | NA              | No  |
| 17:45266575-45266576 | Insertion in promoter | <i>CDC27</i>  | ENST00000531206.5 | c.-38_-37 insGGGGTG | -        | -           | -     | NA        | NA                | Disease causing | No  |
| 19:11332545          | SNV                   | <i>DOCK6</i>  | NM_020812.4       | c.3532C>T           | p.R1178W | rs375012919 | 0.009 | Damaging  | Possibly damaging | NA              | No  |
| 19:9086143           | SNV                   | <i>MUC16</i>  | NM_024690.2       | c.5672G>A           | p.S1891N | rs138381516 | 0.412 | Damaging  | Possibly damaging | NA              | No  |
| 20:48522388          | SNV                   | <i>SPATA2</i> | NM_0011135773.1   | c.1331C>T           | p.P444L  | rs143193219 | 0.001 | Damaging  | Benign            | NA              | No  |

<sup>a</sup>SNP database ID (<http://www.ncbi.nlm.nih.gov/SNP/>)

<sup>b</sup>According to the gnomAD browser v2.1.1 (all samples, <http://gnomad.broadinstitute.org/>)

<sup>c</sup>SIFT (<http://sift.jcvi.org/>)

<sup>d</sup>PolyPhen-2 (<http://genetics.bwh.harvard.edu/pph2/>)

<sup>e</sup>RegulationSpotter (<http://www.regulationspotter.org/>)

<sup>f</sup>According to Rahman 2014

**Suppl. Table 3** Oligonucleotides used for amplification and sequencing of human *CDH1* (NM\_004360) coding exons

| Exon | Primer sequence (5' to 3') |                         |
|------|----------------------------|-------------------------|
|      | Forward                    | Reverse                 |
| 1    | GAACCCTCAGCCAATCAGC        | GTGACGACGGGAGAGGAAG     |
| 2    | AGTCACCCGGTTCATCTAC        | CCTTTCCAACCCCTCCCTAC    |
| 3    | TTGGAGAAGGAATGCTCTTGT      | CAGCGCACTAAAACAACAGC    |
| 4    | GCTGTCTGGCTAGGTTGGA        | GCCAAATCCCTCCCAGAGAA    |
| 5    | AGGGAAAAGACCCAGTGTTGG      | GATGTTACCCCGGTGTCAAC    |
| 6    | GAGCTCAAGTCACCCTCACT       | CTTTGGGCTTGGACAACACT    |
| 7    | ATTAGGGAAGTCTGACACGGT      | TTGCTTTGTCCACGGGATTG    |
| 8    | TGGTCCTGACTTGGTTGTGT       | AGACTTCGCCCATGAGCAGT    |
| 9    | AATCCTTTAGCCCCCTGAGACT     | AAGATACCAGGGGACAAGGGTAT |
| 10   | GAAGCCATGGTAAGTAATTGTGG    | TGAAAGGAGCACAGATAAAGGGA |
| 11   | ACGTTGGAAGTAACCATATAACTG   | TACCACTACACATCTATGCATGT |
| 12   | ATTACTGTTGCCAAGCTGCC       | CATGGCAGTTGGAGCAAAGT    |
| 13   | TCCTCCCCTGGTCTCATCAT       | GCTGGCATAACTTGGGAGT     |
| 14   | GGCTCTCAACACTTGCTCTG       | TCAGAGCTGTTTCAAATGCCT   |
| 15   | ACATAGCCCTGTGTGTATGACT     | GCTCAGGCAAGCTGAAAACA    |
| 16   | TTCTTGCCCCAGATGACAGG       | GTGATTTCTGCATTTCCAGC    |

**Suppl. Table 4** Oligonucleotides used for amplification and sequencing of human *POT1* (NM\_015450) coding exons

| Exon | Primer sequence (5' to 3')      |                                  |
|------|---------------------------------|----------------------------------|
|      | Forward                         | Reverse                          |
| 1    | GACATTCTGTTCAAGTCAACCACAG       | CATGAGGATGGTGTAAACCAGTC          |
| 2    | CTACAGGAGCTTCGAATCTACCAAA       | TAACCTCTGTCTGCTTCTCCAAA          |
| 3    | CAACCCCGAACCGTGTTAACTATAA<br>T  | GAACTTACTCCAATGTTTCACACACG       |
| 4    | GCTAGGGAAAGTTGATCTAGTTATC<br>TG | GCAATGGTCTAGATATGAGAGTAAAG<br>GG |
| 5    | TAGCATTTCCTGGTCCATGAAGTG        | GTCAGACCAAGTAGTTTATCTGCAG        |
| 6    | ATCCTGAGAACTGTCCTGAGAAC         | ATCAGCAGATATTCCAGACAACAG         |
| 7    | GCTGTGTGCATTGCCTTATTTGAG        | TGGTTTCACGTTGCTGTTTGGC           |
| 8    | GCAGTGTGTATTGAAAGCCAAG          | TCTGGGGAATGAAAGCAGTG             |
| 9    | CTTTGGTTCGTAGTTGTGCATC          | CACAGCATGCTTTATCTCATCAGA         |
| 10   | ATAGTGCCAATATTCAGAGGCATAA<br>G  | CTAGACTGTATCACCTATACATGTAAC<br>C |
| 11   | AGCTGATATTCAACCACACTCG          | CTGCTACTACTTAGCTCTATGAGCC        |
| 12   | CCCGGAAAATCTGATGAAAGCAATA<br>G  | GTTTACTTTTTGGCATAGGCCACAG        |
| 13   | ATCATGAATGTGGCATATCTCACC        | GCCAACAAGACACGGTAGAAGAA          |

|    |                                 |                                 |
|----|---------------------------------|---------------------------------|
| 14 | ATTTGGTTCAGGAGGATGCATG          | GCCTTTATCAGAGTGACTAAGCTG        |
| 15 | GTTATTTGTTCTGCAAAGTGAATTATCTCCA | GAACGTGTGCTTATATATATTTGAACCTAGT |
| 16 | CCAAAGTCTCAGCATTTTTGTGC         | CATGTTTCAGCACATGACCCCA          |
| 17 | TAGGGGATGCAGTATTCTTCTG          | CGGTGCCTGCTTGAAGAAATA           |
| 18 | CCTCCAGTTCAATTCTGACACTATC       | TAAGTCCTTTTAGGAACAAAGCAGG       |
| 19 | GGAGTTGAGACCAGCATTCTAGTT        | TTTTATCCCTGCCACTCTCTTCATC       |
| 20 | GATGTACTCACTGTTACCTGCTTGT       | GCCATTATTTACCTTGCACCCAG         |

**Suppl. Table 5** Oligonucleotides used to subclone the human *CDH1* open reading frame amplified from hE-cadherin-pcDNA3 (#45769; Addgene) into the *Xho*I-linearized pIRES-EGFP-puro vector (#45567; Addgene)

| Restriction site | Primer sequence (5' to 3')             |                                       |
|------------------|----------------------------------------|---------------------------------------|
|                  | Forward                                | Reverse                               |
| <i>Xho</i> I     | GGAATCAGATCTCGAGATGGGCC<br>CTTGGAGCCGC | GAAGCTTGAGCTCGAGCTAGTCGTCC<br>TCGCCGC |

**Suppl. Table 6** Oligonucleotides used for site-directed mutagenesis of human *CDH1* variants into a pIRES-CDH1 wildtype-EGFP-puro construct

| Variant                | Primer sequence (5' to 3')                       |                                                 |
|------------------------|--------------------------------------------------|-------------------------------------------------|
|                        | Forward                                          | Reverse                                         |
| c.1774G>A<br>p.(A592T) | GACAACACCCCCATACCAGAAC<br>CTC                    | ATTCACATCAGACAGGATCAGCA<br>GAAG                 |
| c.2450C>T<br>p.(A817V) | ATGAAAATCTGAAAGTGGCTGA<br>TACGGATCCCACAGCCCCGCCT | CAATAAAATTTCCAATTTTCATCGG<br>GATTGGCAGGGCGGGGAA |

**Suppl. Table 7** Oligonucleotides used for quantitative PCR of rat *Cdh1* cDNA (NM\_031334)

| Primer sequence (5' to 3') |                      |
|----------------------------|----------------------|
| Forward                    | Reverse              |
| GGCCCTCCTGATTCTGATCC       | CGGGTATCGTCATCTGGTGG |

**Suppl. Table 8** Oligonucleotides used for quantitative PCR of rat *Pgk1* cDNA (NM\_053291), as described in Langnaese et al. 2008

| Primer sequence (5' to 3') |                         |
|----------------------------|-------------------------|
| Forward                    | Reverse                 |
| ATGCAAAGACTGGCCAAGCTAC     | AGCCACAGCCTCAGCATATTTTC |

**Suppl. Table 9** Oligonucleotides used for amplification and sequencing of rat *Cdh1* cDNA (NM\_031334)

| Primer sequence (5' to 3') |                      |
|----------------------------|----------------------|
| Forward                    | Reverse              |
| TGGCCCTCCTGATTCTGATC       | CTTCAGAACCACTCCCCTCA |

**Suppl. Table 10** Oligonucleotides used for CRISPR knock-in of the human *CDH1* A817V variant in HEK293T cells

| Primer name                       | Primer sequence (5' to 3')                                                                                                                                                                                                 |
|-----------------------------------|----------------------------------------------------------------------------------------------------------------------------------------------------------------------------------------------------------------------------|
| gRNA- <i>CDH1</i> -FP (sense)     | <b>AAACGCCTTATGATTCTCTGCTCGC</b>                                                                                                                                                                                           |
| gRNA- <i>CDH1</i> -RP (antisense) | <b>CACCGCGAGCAGAGAATCATAAGGC</b>                                                                                                                                                                                           |
| ssODN- <i>CDH1</i> -A817V         | TCGTACCTTACATATTGCTAGACTTCTTGCCCCAGATGACAGGTGTGCCCTTCTTTCACTAAAAGATGCTTTTGTCCCTTCTTCTTTAGAATCTGAAAG* <b>T</b> *GGCTGATACTGACCCACAGC* <b>T</b> *CCGCCTTATGATTCTCTGCTCGTGTGACTATGAAGGAAGCGGTTCCGAAGCTGCTAGTCTGAGCTCCCTGAACTC |

Given are sense and antisense oligonucleotides designed for gRNA (target sequence in bold print) insertion into the pSpCas9(BB)-2A-GFP vector (#48138, Addgene), and sequence of the synthetic single-stranded oligo DNA nucleotide (ssODN) containing the *CDH1*:c.2450C>T p.(A817V) variant and the synonymous PAM variant c.2472C>T (both indicated in bold print) used as homology-directed repair template in the CRISPR/Cas9 protocol.

**Suppl. Table 11** Oligonucleotides used to determine the sequence of gRNA on- and off-target sites in the three HEK293T cell clones selected for further analysis harboring either human wildtype *CDH1*, a heterozygous or homozygous *CDH1* A817V knock-in

| Locus                        | Primer sequence (5' to 3')   |                               |
|------------------------------|------------------------------|-------------------------------|
|                              | Forward                      | Reverse                       |
| <i>CDH1</i> -E16 on-target   | TCTGGGTGCATTGTCGTACC         | TCTCAAGGGAAGGGAGCTGA          |
| <i>PARP9</i> -E7 off-target  | CCGTGTTCTAATAGAAGTGGAGTGCCTC | TGATCAGGGTAGAGAGTAGGCAGGTA    |
| AC073218.1 off-target        | CAACCAAATAGGTGGATCCTGCTCT    | ACTAGTCAGTTCACAAATTGTTGTGAGAG |
| <i>VAMP1</i> -E3 off-target  | GTGGAGGAGGTAGGTAGATAGCTGT    | GAGGAGGGGACAAGAAAATTCACC      |
| <i>VANGL1</i> -E7 off-target | GACCAGAAGTGTGGTGGAAACC       | ACATTCCTCTAAACATGTGTCTGCCTAC  |
| <i>STRN4</i> -E26 off-target | CAAGGTCTTCGTATGATGCCCCACC    | CTCTGCACCTCCAGCGAGG           |

E, exon



**Suppl. Table 12** Rare non-silent *CDH1* variants predicted to be deleterious identified in leukocyte DNA of glioma families or tumor DNA of 99 oligodendrogliomas, WHO grade II/III, IDH-mutant and 1p/19q-codeleted and their allele frequency compared to controls

| Exon | Genomic position (GRCh37/hg19) | Nucleotide alteration | Deduced protein change | Protein domain | dbSNP <sup>a</sup> | Prediction according to |                         | Minor allele frequency (allele count/allele number) |                                           |                         |
|------|--------------------------------|-----------------------|------------------------|----------------|--------------------|-------------------------|-------------------------|-----------------------------------------------------|-------------------------------------------|-------------------------|
|      |                                |                       |                        |                |                    | SIFT <sup>b</sup>       | PolyPhen-2 <sup>c</sup> | Glioma families <sup>d</sup>                        | Oligodendrogliomas <sup>e</sup>           | Controls <sup>f</sup>   |
| 12   | 16:68855966                    | c.1774G>A             | p.A592T                | Ectodomain     | rs35187787         | Damaging                | Benign                  | 0.03333<br>(1/30)                                   | 0.01333<br>(2/150) <sup>g,h</sup>         | 0.00297<br>(357/120276) |
| 12   | 16:68856106                    | c.1913G>A             | p.W638*                | Ectodomain     | -                  | NA                      | NA                      | -                                                   | <b>0.00667</b><br>(1/150) <sup>g</sup>    | 0.00000<br>(0/120292)   |
| 14   | 16:68862157                    | c.2245C>T             | p.R749W                | Intracellular  | rs776975632        | Damaging                | Probably damaging       | -                                                   | <b>0.00510</b><br>(1/192) <sup>h</sup>    | 0.00000<br>(0/120292)   |
| 16   | 16:68867203                    | c.2450C>T             | p.A817V                | Intracellular  | rs587782024        | Damaging                | Probably damaging       | <b>0.03333</b><br>(1/30)                            | -                                         | 0.00003<br>(3/109404)   |
| 16   | 16:68867221                    | c.2468C>T             | p.T823I                | Intracellular  | -                  | Damaging                | Probably damaging       | -                                                   | <b>0.01064</b><br>(2 <sup>h,i</sup> /186) | 0.00000<br>(0/120292)   |
| 16   | 16:68867343                    | c.2590G>A             | p.E864K                | Intracellular  | rs142927667        | Damaging                | Possibly damaging       | -                                                   | <b>0.00532</b><br>(1/186) <sup>h</sup>    | 0.00003<br>(3/109408)   |

Given are all identified rare (minor allele frequency, MAF  $\leq 0.5\%$ ), non-silent (i.e. splice site, frameshift, in-frame indels, stop gained/lost and non-synonymous missense) variants predicted to be deleterious by at least one prediction tool, i.e. SIFT or PolyPhen-2, in the *CDH1* gene (NM\_004360) and their allele frequencies in glioma families (leukocyte DNA) and oligodendrogliomas, WHO grade II/III, IDH-mutant and 1p/19q-codeleted (tumor DNA) compared to controls. The MAFs indicated in bold print significantly differ from controls ( $p \leq 0.01$ , two-sided Fisher's exact test).

<sup>a</sup>SNP database ID (<http://www.ncbi.nlm.nih.gov/SNP/>)

<sup>b</sup>SIFT (<http://sift.jcvi.org/>)

<sup>c</sup>PolyPhen-2 (<http://genetics.bwh.harvard.edu/pph2/>)

<sup>d</sup>Leukocyte DNA of glioma families with at least two glioma patients each was investigated (n=15)

<sup>e</sup>Tumor DNA of oligodendrogliomas, WHO grade II/III, IDH-mutant and 1p/19q-codeleted was investigated (*CDH1* exons 1-11 n=28-65, exon 12 n=75, exon 13 n=72, exon 14 n=96, exon 15 n=99, exon 16 n=93)

<sup>f</sup>Control individuals according to the gnomAD browser v2.1.1 (<http://gnomad.broadinstitute.org/>) (n=60,146)

<sup>g</sup>Leukocyte DNA was not available to determine whether the variant is present in the germline or not

<sup>h</sup>Variant not detected in DNA from non-neoplastic tissue or whole blood

<sup>i</sup>Homozygous variant detected in one anaplastic oligodendroglioma, WHO grade III, IDH-wildtype and 1p/19q-codeleted

**Suppl. Table 13** Oligodendroglioma patients and oligodendrogliomas harboring rare non-silent *CDH1* variants predicted to be deleterious

| Patient                                                                          | Gender | Age at diagnosis (years) | Glioma histology, WHO grade | Glioma localization            | Molecular characteristics      | Nucleotide alteration                                         | Deduced protein change | Previously described in the germline of patients diagnosed with                                                          |                                                                                                                          |                                                                                                            |
|----------------------------------------------------------------------------------|--------|--------------------------|-----------------------------|--------------------------------|--------------------------------|---------------------------------------------------------------|------------------------|--------------------------------------------------------------------------------------------------------------------------|--------------------------------------------------------------------------------------------------------------------------|------------------------------------------------------------------------------------------------------------|
|                                                                                  |        |                          |                             |                                |                                |                                                               |                        | Cancer entity                                                                                                            | References                                                                                                               |                                                                                                            |
| <b>CDH1 variants identified in the leukocyte DNA of familial glioma patients</b> |        |                          |                             |                                |                                |                                                               |                        |                                                                                                                          |                                                                                                                          |                                                                                                            |
| Glioma family 1                                                                  | III.1  | Male                     | 37                          | O II                           | Left frontal                   | IDH-mutant, 1p/19q-codeleted                                  | c.2450C>T              | p.A817V                                                                                                                  | Colorectal cancer                                                                                                        | Raskin et al. 2017                                                                                         |
|                                                                                  | III.2  | Female                   | 38                          | AO III                         | Left frontal                   | IDH-mutant, 1p/19q-codeleted                                  |                        |                                                                                                                          |                                                                                                                          |                                                                                                            |
|                                                                                  | II.2   | Male                     | i) 51<br>ii) 53<br>iii) 70  | i) A II<br>ii) and iii) AO III | Left frontal                   | i) Not evaluated<br>ii) and iii) IDH-mutant, 1p/19q-codeleted |                        |                                                                                                                          |                                                                                                                          |                                                                                                            |
| Glioma family 2                                                                  | III.1  | Male                     | 30                          | O II                           | Right frontal paramedian       | IDH-mutant, 1p/19q-codeleted                                  | c.1774G>A              | p.A592T                                                                                                                  | i) Prostate cancer<br>ii) Mixed gastric cancer<br>iii) Invasive lobular breast cancer<br>iv) Colon and colorectal cancer | i) Jonsson et al. 2002<br>ii) Garziera et al. 2013<br>iii) Valente et al. 2014<br>iv) Salashor et al. 2001 |
| <b>CDH1 variants identified in the tumor DNA of oligodendrogliomas</b>           |        |                          |                             |                                |                                |                                                               |                        |                                                                                                                          |                                                                                                                          |                                                                                                            |
| O11                                                                              | Female | 76                       | AO III                      | Right frontal                  | IDH-wildtype, 1p/19q-codeleted | c.2468C>T                                                     | p.T823I                | -                                                                                                                        | -                                                                                                                        |                                                                                                            |
| O12                                                                              | Female | 43                       | AO III                      | Left frontal                   | IDH-mutant, 1p/19q-codeleted   | c.2590G>A                                                     | p.E864K                | i) Colon cancer (Lynch syndrome)<br>iii) Breast and/or ovarian cancer                                                    | i) Yurgelun et al. 2015<br>ii) Singh et al. 2018                                                                         |                                                                                                            |
| O40                                                                              | Female | 33                       | AO III                      | Occipital lobe                 | IDH-mutant, 1p/19q-codeleted   | c.2245C>T                                                     | p.R749W                | Diffuse gastric cancer                                                                                                   | Kaurah et al. 2007                                                                                                       |                                                                                                            |
| O46                                                                              | Male   | 36                       | O II                        | Right frontal                  | IDH-mutant, 1p/19q-codeleted   | c.1774G>A                                                     | p.A592T                | i) Prostate cancer<br>ii) Mixed gastric cancer<br>iii) Invasive lobular breast cancer<br>iv) Colon and colorectal cancer | i) Jonsson et al. 2002<br>ii) Garziera et al. 2013<br>iii) Valente et al. 2014<br>iv) Salashor et al. 2001               |                                                                                                            |
| O88                                                                              | Male   | 58                       | AO III                      | Right frontal parasagittal     | IDH-mutant, 1p/19q-codeleted   |                                                               |                        |                                                                                                                          |                                                                                                                          |                                                                                                            |
| O47                                                                              | Male   | 38                       | AO III                      | -                              | IDH-mutant, 1p/19q-codeleted   | c.1913G>A                                                     | p.W638*                | Diffuse gastric cancer                                                                                                   | Kaurah et al. 2007                                                                                                       |                                                                                                            |

NCBI Reference Sequence: NM\_004360

O II, oligodendroglioma, WHO grade II; AO III, anaplastic oligodendroglioma, WHO grade III; A II, astrocytoma

**Suppl. Table 14** Rare non-silent variant predicted to be deleterious identified by mutational analysis of *CDH1* exons 14 to 16 in tumor DNA of 65 renal cell carcinomas (RCC) and its allele frequency compared to controls

| Exon | Genomic position (GRCh37/hg19) | Nucleotide alteration | Deduced protein change | Protein domain | dbSNP <sup>a</sup> | Prediction according to |                         | Minor allele frequency (allele count/allele number) |                       |                      |                                  |
|------|--------------------------------|-----------------------|------------------------|----------------|--------------------|-------------------------|-------------------------|-----------------------------------------------------|-----------------------|----------------------|----------------------------------|
|      |                                |                       |                        |                |                    | SIFT <sup>b</sup>       | PolyPhen-2 <sup>c</sup> | Chromophobe RCC (n=26)                              | Clear cell RCC (n=21) | Papillary RCC (n=18) | Controls <sup>d</sup> (n=60,146) |
| 16   | 16:68867310                    | c.2557T>C             | p.S853P                | Intracellular  | rs765978401        | Damaging                | Probably damaging       | <b>0.03846</b><br>(2 <sup>e</sup> /52)              | -                     | -                    | 0.00000<br>(0/120292)            |

Given are all rare (minor allele frequency, MAF  $\leq 0.5\%$ ), non-silent (i.e. splice site, frameshift, in-frame indels, stop gained/lost and non-synonymous missense) variants predicted to be deleterious by at least one prediction tool, i.e. SIFT or PolyPhen-2, in exons 14 to 16 of the *CDH1* gene (NM\_004360) and their allele frequency in RCCs (tumor DNA) compared to controls. The MAF indicated in bold print significantly differs from controls ( $p \leq 0.001$ , two-sided Fisher's exact test).

<sup>a</sup>SNP database ID (<http://www.ncbi.nlm.nih.gov/SNP/>)

<sup>b</sup>SIFT (<http://sift.jcvi.org/>)

<sup>c</sup>PolyPhen-2 (<http://genetics.bwh.harvard.edu/pph2/>)

<sup>d</sup>Control individuals according to the gnomAD browser v2.1.1 (<http://gnomad.broadinstitute.org/>)

<sup>e</sup>Homozygous variant in one chromophobe RCC

<sup>f</sup>Leukocyte DNA was not available to determine whether the variant is present in the germline or not

**Suppl. Table 15** No indels at off-target sites were detected in the selected  $CDH1^{WT/WT}$ ,  $CDH1^{WT/A817V}$ , and  $CDH1^{A817V/A817V}$  HEK293T single cell clones

| Off-target genes / lincRNA | Mismatches at off-target sites and CFD score                                      |           | Results from sequence analysis of genomic DNA amplicons from off-target sites |                                                |                                                   |
|----------------------------|-----------------------------------------------------------------------------------|-----------|-------------------------------------------------------------------------------|------------------------------------------------|---------------------------------------------------|
|                            | Compared to gRNA on-target site in <i>CDH1</i> (exon 16):<br>GCCTTATGATTCTCTGCTCG | CFD score | $CDH1^{WT/WT}$<br>HEK293T clone                                               | $CDH1^{WT/A817V}$<br>HEK293T<br>knock-in clone | $CDH1^{A817V/A817V}$<br>HEK293T<br>knock-in clone |
| <i>PARP9</i> (exon 7)      | TG.....C.....T                                                                    | 0.1457    | No indel                                                                      | No indel                                       | No indel                                          |
| AC073218.1 (lincRNA)       | .....TT....A.T....                                                                | 0.1005    | No indel                                                                      | No indel                                       | No indel                                          |
| <i>VAMP1</i> (exon 3)      | .A...G.....G.T.                                                                   | 0.0814    | No indel                                                                      | No indel                                       | No indel                                          |
| <i>VANGL1</i> (exon 7)     | ...A....C..GG.....                                                                | 0.0154    | No indel                                                                      | No indel                                       | No indel                                          |
| <i>STRN4</i> (exon 26)     | ..A..C...G.....A..                                                                | 0.0094    | No indel                                                                      | No indel                                       | No indel                                          |

All coding off-target sites with homology to the given guide RNA (gRNA) on-target site in *CDH1* exon 16 were determined by the CRISPOR webtool (<http://crispor.tefor.net/>), and are sorted by their cutting frequency determination (CFD) score. Sequence analysis of genomic DNA amplicons was performed by direct sequencing (oligonucleotide sequences are given in Suppl. Table 11).

## References

- Darden T, York D, Pedersen L (1993) Particle Mesh Ewald - an Nlog(N) method for Ewald Sums in Large Systems. *J Chem Phys* 98:10089-10092 Doi 10.1063/1.464397
- Garziera M, Canzonieri V, Cannizzaro R, Geremia S, Caggiari L, De Zorzi M, Maiero S, Orzes E, Perin T, Zanussi S, De Paoli P, De Re V (2013) Identification and characterization of *CDH1* germline variants in sporadic gastric cancer patients and in individuals at risk of gastric cancer. *PLoS One* 8:e77035 Doi 10.1371/journal.pone.0077035
- Humphrey W, Dalke A, Schulten K (1996) VMD: Visual molecular dynamics. *J Mol Graph Model* 14:33-38 Doi 10.1016/0263-7855(96)00018-5
- Jonsson BA, Bergh A, Stattin P, Emmanuelsson M, Grönberg H (2002) Germline mutations in E-cadherin do not explain association of hereditary prostate cancer, gastric cancer and breast cancer. *Int J Cancer* 98:838-843 Doi 10.1002/ijc.10258
- Jorgensen WL, Chandrasekhar J, Madura JD, Impey RW, Klein ML (1983) Comparison of Simple Potential Functions for Simulating Liquid Water. *J Chem Phys* 79:926-935 Doi 10.1063/1.445869
- Kaurah P, MacMillan A, Boyd N, Senz J, De Luca A, Chun N, Suriano G, Zaor S, Van Manen L, Gilpin C, Nikkel S, Connolly-Wilson M, Weissman S, Rubinstein WS, Sebold C, Greenstein R, Stroop J, Yim D, Panzini B, McKinnon W, Greenblatt M, Wirtzfeld D, Fontaine D, Coit D, Yoon S, Chung D, Lauwers G, Pizzuti A, Vaccaro C, Redal MA, Oliveira C, Tischkowitz M, Olschwang S, Gallinger S, Lynch H, Green J, Ford J, Pharoah P, Fernandez B, Huntsman D (2007) Founder and recurrent *CDH1* mutations in families with hereditary diffuse gastric cancer. *JAMA* 297:2360-2372 Doi 10.1001/jama.297.21.2360
- Langnaese K, John R, Schweizer H, Ebmeyer U, Keilhoff G (2008) Selection of reference genes for quantitative real-time PCR in a rat asphyxial cardiac arrest model. *BMC Mol Biol* 9:53 Doi 10.1186/1471-2199-9-53
- Rahman N (2014) Realizing the promise of cancer predisposition genes. *Nature* 505:302-308 Doi 10.1038/nature12981
- Raskin L, Guo Y, Du L, Clendenning M, Rosty C, Lindor NM, Gruber SB, Buchanan DD (2017) Targeted sequencing of established and candidate colorectal cancer genes in the Colon Cancer Family Registry Cohort. *Oncotarget* 8:93450-93463 Doi 10.18632/oncotarget.18596
- Salahshor S, Hou H, Diep CB, Loukola A, Zhang H, Liu T, Chen J, Iselius L, Rubio C, Lothe RA, Aaltonen L, Sun XF, Linmark G, Lindblom A (2001) A germline E-cadherin mutation in a family with gastric and colon cancer. *Int J Mol Med* 8:439-443 Doi 10.3892/ijmm.8.4.439

- Sethi A, Eargle J, Black AA, Luthey-Schulten Z (2009) Dynamical networks in tRNA: protein complexes. *P Natl Acad Sci USA* 106:6620-6625 Doi 10.1073/pnas.0810961106
- Singh J, Thota N, Singh S, Padhi S, Mohan P, Deshwal S, Sur S, Ghosh M, Agarwal A, Sarin R, Ahmed R, Almel S, Chakraborti B, Raina V, DadiReddy PK, Smruti BK, Rajappa S, Dodagoudar C, Aggarwal S, Singhal M, Joshi A, Kumar R, Kumar A, Mishra DK, Arora N, Karaba A, Sankaran S, Katragadda S, Ghosh A, Veeramachaneni V, Ramesh H, Mannan AU (2018) Screening of over 1000 Indian patients with breast and/or ovarian cancer with a multi-gene panel: prevalence of *BRCA1/2* and non-*BRCA* mutations. *Breast Cancer Res Treat* 170:189-196 Doi 10.1007/s10549-018-4726-x
- Valente AL, Rummel S, Shriver CD, Ellsworth RE (2014) Sequence-based detection of mutations in cadherin 1 to determine the prevalence of germline mutations in patients with invasive lobular carcinoma of the breast. *Hered Cancer Clin Pract* 12:17 Doi 10.1186/1897-4287-12-17
- Yurgelun MB, Allen B, Kaldate RR, Bowles KR, Judkins T, Kaushik P, Roa BB, Wenstrup RJ, Hartman AR, Syngal S (2015) Identification of a Variety of Mutations in Cancer Predisposition Genes in Patients With Suspected Lynch Syndrome. *Gastroenterology* 149:604-613.e620 Doi 10.1053/j.gastro.2015.05.006
